# Supplementary material
Source: MDPI journal article supplement (https://www.mdpi.com/2073-4433/10/7/408)
Supplement: s1 [file s1]

# Supplemental Information for

## No particle mass enhancement from induced atmospheric ageing at a rural site in northern Europe

Erik Ahlberg<sup>1,2,\*</sup>, Stina Ausmeel<sup>2</sup>, Axel Eriksson<sup>2,3</sup>, Thomas Holst<sup>4</sup>, Tomas Karlsson<sup>4</sup>, William H. Brune<sup>5</sup>, Göran Frank<sup>2</sup>, Pontus Roldin<sup>2</sup>, Adam Kristensson<sup>2</sup>, Birgitta Svenningsson<sup>2</sup>

<sup>1</sup> Centre for Environmental and Climate Research, Lund University, Sölvegatan 37, 223 52 Lund, Sweden

<sup>2</sup> Division of Nuclear Physics, Lund University, Box 118, 221 00 Lund, Sweden

<sup>3</sup> Ergonomics and Aerosol Technology, Lund University, Box 118, 221 00 Lund, Sweden

<sup>4</sup> Department of Physical Geography and Ecosystem Science, Lund University, Sölvegatan 12, 223 62 Lund, Sweden

<sup>5</sup> Department of Meteorology, Pennsylvania State University, University Park, PA, United States

\* Correspondence: erik.ahlberg@nuclear.lu.se

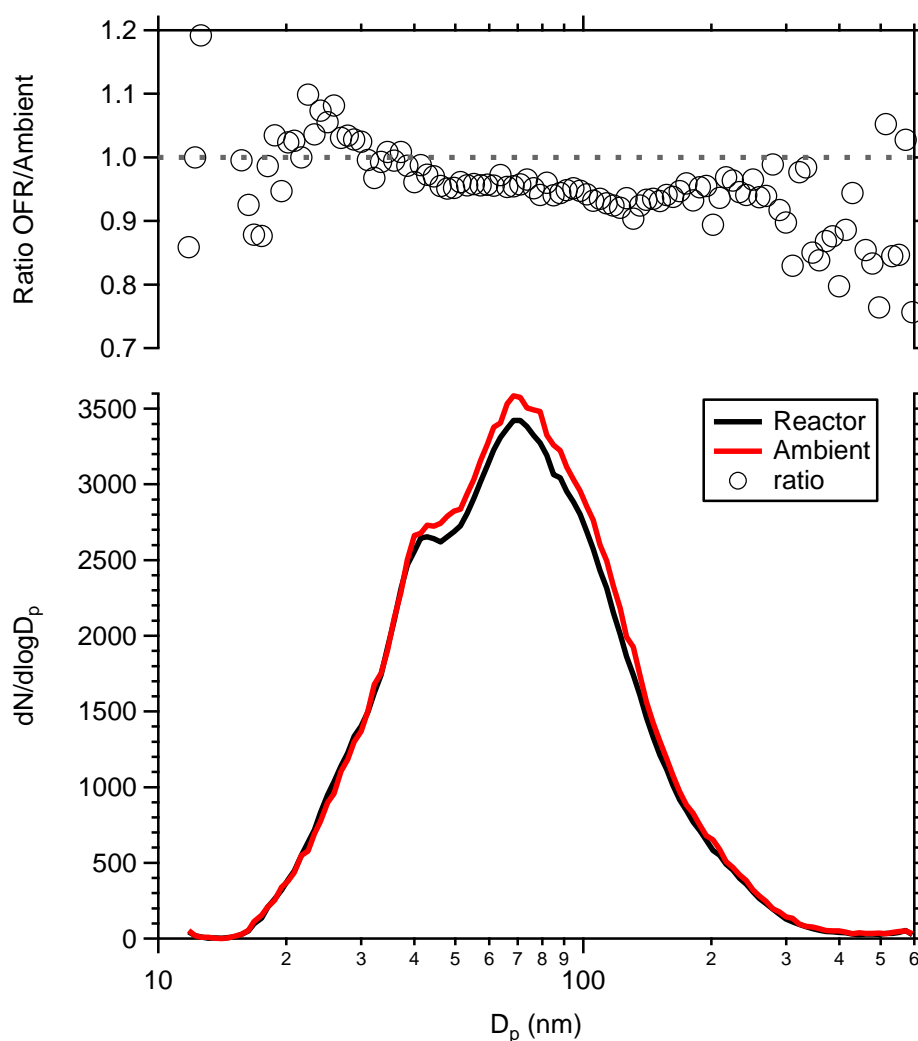

**Figure S1.** Average size spectrum and size resolved losses in the reactor from a period when the UV lamps were off. The ratio between OFR and ambient data shows significant noise at sizes where the number concentration is low.

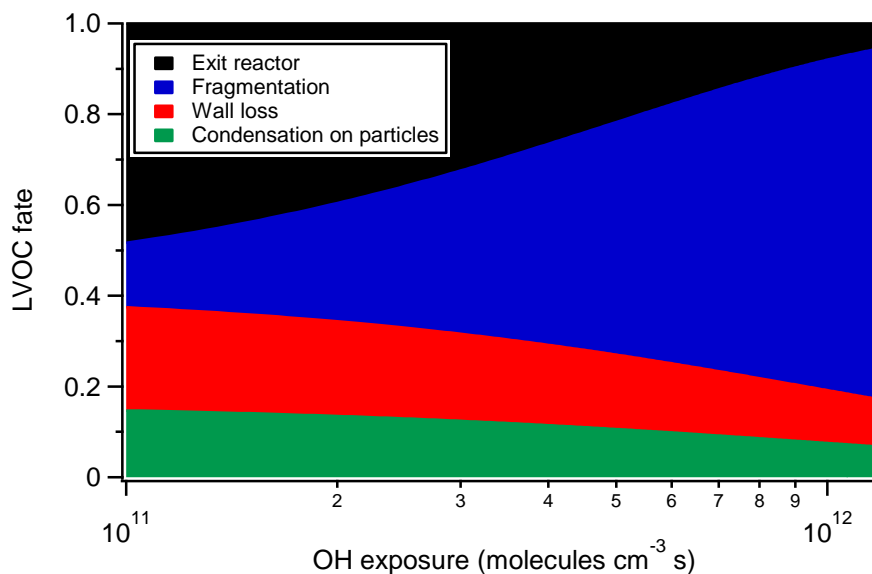

**Figure S2.** The modeled fractional fate of LVOCs in the reactor as a function of OH exposure. The model was constructed using the same principles as in Palm *et al.* [1]. The settings used were  $k_{OH} = 1 \times 10^{-11} \text{ cm}^3 \text{ molecules}^{-1} \text{ s}^{-1}$ , a residence time of 160 s, a condensation sink of  $1.29 \times 10^{-3} \text{ s}^{-1}$  (campaign average, corresponding to a surface area concentration of  $42 \mu\text{m}^2 \text{ cm}^{-3}$ ), eddy diffusion coefficient of 0.0042 and wall loss rate of  $0.0020 \text{ s}^{-1}$ . Loss to fragmentation is assumed after reaction with OH five times.

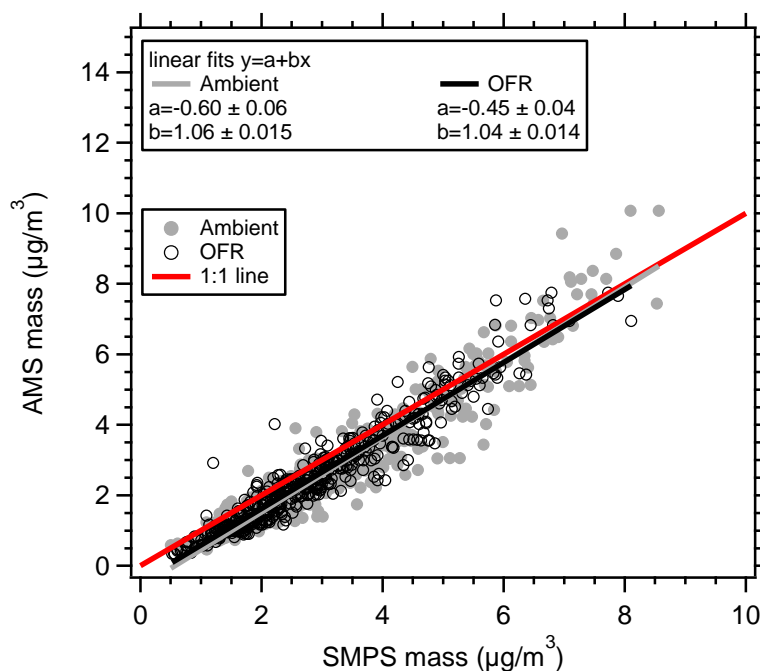

**Figure S3.** Total AMS and SMPS mass concentrations. The slopes of the data gives the collection efficiency of the AMS. The offset in SMPS mass (a-value) is likely from a constant error at the high end of the SMPS size spectra.

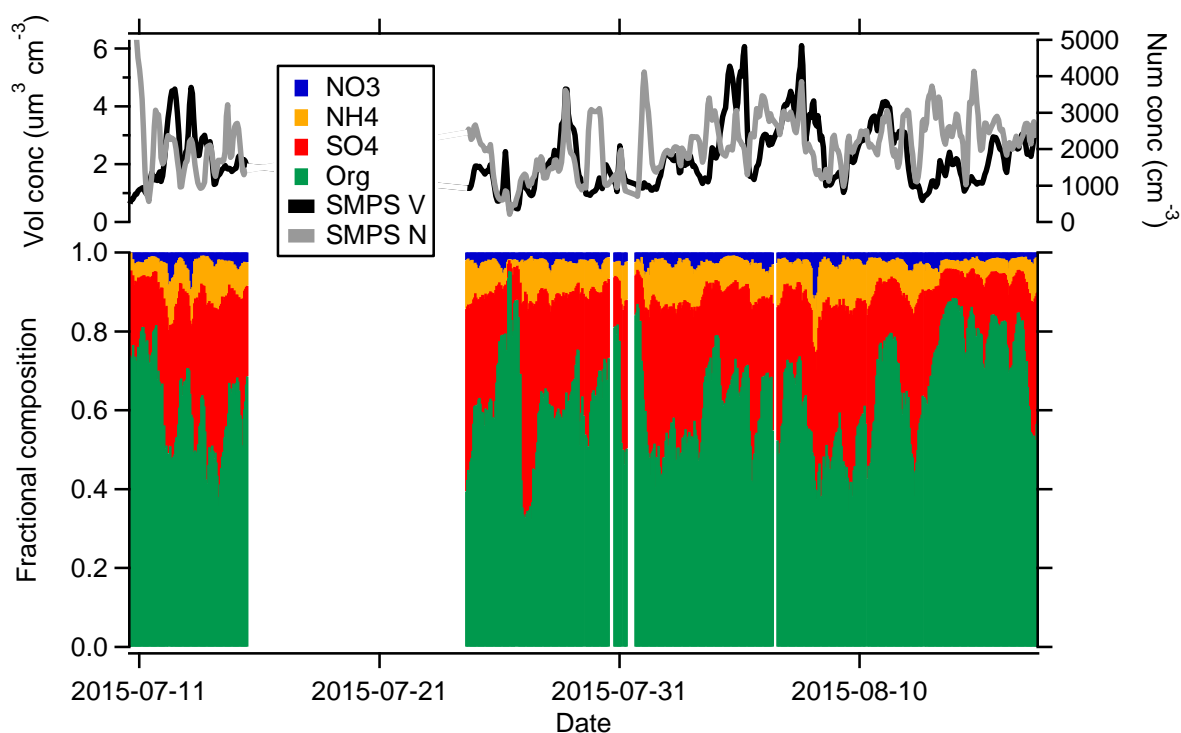

**Figure S4.** Overview of the campaign showing SMPS number and volume concentrations and AMS chemical composition.

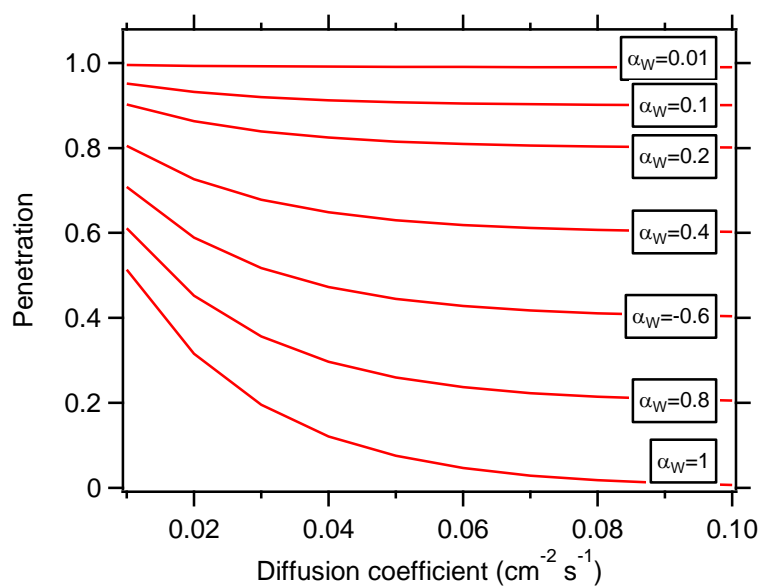

**Figure S5.** Calculated penetration through the inlet up to the reactor as a function of diffusion coefficients and wall mass accommodation coefficient.

1. Palm, B. B., Campuzano-Jost, P., Ortega, A. M., Day, D. A., Kaser, L., Jud, W., Karl, T., Hansel, A., Hunter, J. F., Cross, E. S., Kroll, J. H., Peng, Z., Brune, W. H. and Jimenez, J. L.: In situ secondary organic aerosol formation from ambient pine forest air using an oxidation flow reactor. *Atmos. Chem. Phys.*, 16, 2943, 2016.
